# Supplementary material for: Attitudes of urban residents towards environmental migration in Kenya and Vietnam
Source: Springer Nature journal article supplement (doi:10.1038/s41558-020-0805-1), 2020-06-22
Supplement: 41558_2020_805_MOESM2_ESM.pdf [file 41558_2020_805_MOESM2_ESM.pdf]

## Reporting Summary

Nature Research wishes to improve the reproducibility of the work that we publish. This form provides structure for consistency and transparency in reporting. For further information on Nature Research policies, see [Authors & Referees](#) and the [Editorial Policy Checklist](#).

### Statistics

For all statistical analyses, confirm that the following items are present in the figure legend, table legend, main text, or Methods section.

n/a Confirmed

- The exact sample size ( $n$ ) for each experimental group/condition, given as a discrete number and unit of measurement
- A statement on whether measurements were taken from distinct samples or whether the same sample was measured repeatedly
- The statistical test(s) used AND whether they are one- or two-sided  
*Only common tests should be described solely by name; describe more complex techniques in the Methods section.*
- A description of all covariates tested
- A description of any assumptions or corrections, such as tests of normality and adjustment for multiple comparisons
- A full description of the statistical parameters including central tendency (e.g. means) or other basic estimates (e.g. regression coefficient) AND variation (e.g. standard deviation) or associated estimates of uncertainty (e.g. confidence intervals)
- For null hypothesis testing, the test statistic (e.g.  $F$ ,  $t$ ,  $r$ ) with confidence intervals, effect sizes, degrees of freedom and  $P$  value noted  
*Give  $P$  values as exact values whenever suitable.*
- For Bayesian analysis, information on the choice of priors and Markov chain Monte Carlo settings
- For hierarchical and complex designs, identification of the appropriate level for tests and full reporting of outcomes
- Estimates of effect sizes (e.g. Cohen's  $d$ , Pearson's  $r$ ), indicating how they were calculated

*Our web collection on [statistics for biologists](#) contains articles on many of the points above.*

### Software and code

Policy information about [availability of computer code](#)

Data collection

Data collection is described in Methods section of the paper

Data analysis

All replication data and code can be found here: [https://dataverse.harvard.edu/dataverse/urban\\_attitudes\\_on\\_environmental\\_migrants](https://dataverse.harvard.edu/dataverse/urban_attitudes_on_environmental_migrants)

For manuscripts utilizing custom algorithms or software that are central to the research but not yet described in published literature, software must be made available to editors/reviewers. We strongly encourage code deposition in a community repository (e.g. GitHub). See the Nature Research [guidelines for submitting code & software](#) for further information.

### Data

Policy information about [availability of data](#)

All manuscripts must include a [data availability statement](#). This statement should provide the following information, where applicable:

- Accession codes, unique identifiers, or web links for publicly available datasets
- A list of figures that have associated raw data
- A description of any restrictions on data availability

*Provide your data availability statement here.*

### Field-specific reporting

Please select the one below that is the best fit for your research. If you are not sure, read the appropriate sections before making your selection.

- Life sciences       Behavioural & social sciences       Ecological, evolutionary & environmental sciences

For a reference copy of the document with all sections, see [nature.com/documents/nr-reporting-summary-flat.pdf](https://nature.com/documents/nr-reporting-summary-flat.pdf)

# Behavioural & social sciences study design

All studies must disclose on these points even when the disclosure is negative.

|                   |                                                                                                                                                                                                                                                                                                                                                                                                                 |
|-------------------|-----------------------------------------------------------------------------------------------------------------------------------------------------------------------------------------------------------------------------------------------------------------------------------------------------------------------------------------------------------------------------------------------------------------|
| Study description | Survey experiment of urbanites attitudes towards environmental migrants                                                                                                                                                                                                                                                                                                                                         |
| Research sample   | Residents of three cities in Vietnam (N=1,200) and of three cities in Kenya (N=1,200)                                                                                                                                                                                                                                                                                                                           |
| Sampling strategy | We employed a multi-stage convenience sampling strategy to recruit participants. Details are described in the Methods section.                                                                                                                                                                                                                                                                                  |
| Data collection   | In both countries we contracted a survey company to do face-to-face interviews. Details are described in the Methods section.                                                                                                                                                                                                                                                                                   |
| Timing            | The field work was conducted in July-October 2018 for Vietnam and in January-March 2019 for Kenya                                                                                                                                                                                                                                                                                                               |
| Data exclusions   | no data was excluded                                                                                                                                                                                                                                                                                                                                                                                            |
| Non-participation | Response rates were: Ho Chi Minh City 74% Nairobi 75%, Binh Duong 85% , Kisumu 93%, Hanoi 77%, Mombasa 83%                                                                                                                                                                                                                                                                                                      |
| Randomization     | The surveys were conducted on computer tablets, which allows for randomly generated conjoint profiles for each respondent using a specific software based on a random generator approach. We applied uniform randomization without any restriction, i.e., each attribute level has an equal probability of being drawn and every possible level combination has the possibility of being shown to a respondent. |

## Reporting for specific materials, systems and methods

We require information from authors about some types of materials, experimental systems and methods used in many studies. Here, indicate whether each material, system or method listed is relevant to your study. If you are not sure if a list item applies to your research, read the appropriate section before selecting a response.

### Materials & experimental systems

| n/a                                 | Involvement in the study                             |
|-------------------------------------|------------------------------------------------------|
| <input checked="" type="checkbox"/> | <input type="checkbox"/> Antibodies                  |
| <input checked="" type="checkbox"/> | <input type="checkbox"/> Eukaryotic cell lines       |
| <input checked="" type="checkbox"/> | <input type="checkbox"/> Palaeontology               |
| <input checked="" type="checkbox"/> | <input type="checkbox"/> Animals and other organisms |
| <input checked="" type="checkbox"/> | <input type="checkbox"/> Human research participants |
| <input checked="" type="checkbox"/> | <input type="checkbox"/> Clinical data               |

### Methods

| n/a                                 | Involvement in the study                        |
|-------------------------------------|-------------------------------------------------|
| <input checked="" type="checkbox"/> | <input type="checkbox"/> ChIP-seq               |
| <input checked="" type="checkbox"/> | <input type="checkbox"/> Flow cytometry         |
| <input checked="" type="checkbox"/> | <input type="checkbox"/> MRI-based neuroimaging |
